# FABULA

Zeitschrift für Erzählforschung / Journal of Folktale Studies  
Revue des Etudes sur le Conte Populaire

Rate card no. 12/2009

**Print run:** 450 copies

**Printing process:** Offset

**Artwork requirements:** PDF-Files directly:

**AZ Druck und Datentechnik GmbH**

ISDN: + 49 (831) 206-473 Leonardo

e-mail: [degruyter@az-druck.de](mailto:degruyter@az-druck.de)

Datenträger an: AZ Druck und Datentechnik GmbH

Heisinger Straße 16, D-87437 Kempten (Allgäu)

Tel.: 0831 / 206 - 185

Fax.: 0831 / 206 - 369

Please fax a copy of your ad together with the name of the file to the printing house.

Please send your advertisement order and a copy of your ad to the publisher.

**Dates of publication:** 2 double issues per year

**Copy deadlines:** on request

**Format of the journal:** 240 mm height x 167 mm width

**Advertising rates:**

|           |                              |          |
|-----------|------------------------------|----------|
| Full page | 192 mm height x 113 mm width | 600 EURO |
| Half page | 94 mm height x 113 mm width  | 300 EURO |

**Series discounts:** 3 insertions 3%; 6 insertions 5%

**Inserts:** on request

**Terms of payment:** net - on receipt of invoice

**Bankers:** Postbank Berlin, Acct. no. 103 07-108 (BLZ 100 100 10)  
Berliner Bank AG, Acct. no. 32 07523 500 (BLZ 100 200 00)

The publisher reserves the right to refuse advertisements.

**Orders and enquiries to:** Dietlind Makswitat  
Advertising Coordinator.  
Walter de Gruyter GmbH & Co.  
Genthiner Straße 13  
D-10785 Berlin  
Tel (+49) 30 - 260 05-131; Fax (+49) 30 - 260 05-322  
e-mail: <mailto:anzeigen@degruyter.com>
